# Supplementary material for: Effects of air pollution control policies on PM 2.5 pollution improvement in China from 2005 to 2017: a satellite based perspective
Source: Copernicus journal article supplement (doi:10.5194/acp-2018-1191), 2018-11-23
Supplement: Supplementary file [file acp-2018-1191-AC1-supplement.zip]

# Supplemental Material

## Effects of air pollution control policies on PM<sub>2.5</sub> pollution improvement in China from 2005 to 2017: a satellite based perspective

Zongwei Ma <sup>1</sup>, Riyang Liu <sup>1</sup>, Yang Liu <sup>2</sup>, Jun Bi <sup>1, 3, \*</sup>

<sup>1</sup> State Key Laboratory of Pollution Control and Resource Reuse, School of the Environment, Nanjing University, Nanjing, Jiangsu, China

<sup>2</sup> Department of Environmental Health, Rollins School of Public Health, Emory University, Atlanta, GA, USA

<sup>3</sup> Jiangsu Collaborative Innovation Center of Atmospheric Environment and Equipment Technology (CICAEET), Nanjing University of Information Science & Technology, Nanjing, Jiangsu, China

**\* Correspondence to:**

**Dr. Jun Bi**, School of the Environment, Nanjing University, 163 Xianlin Avenue, Nanjing 210023, P. R. China. Tel.: +86 25 89681605. E-mail address: jbi@nju.edu.cn.

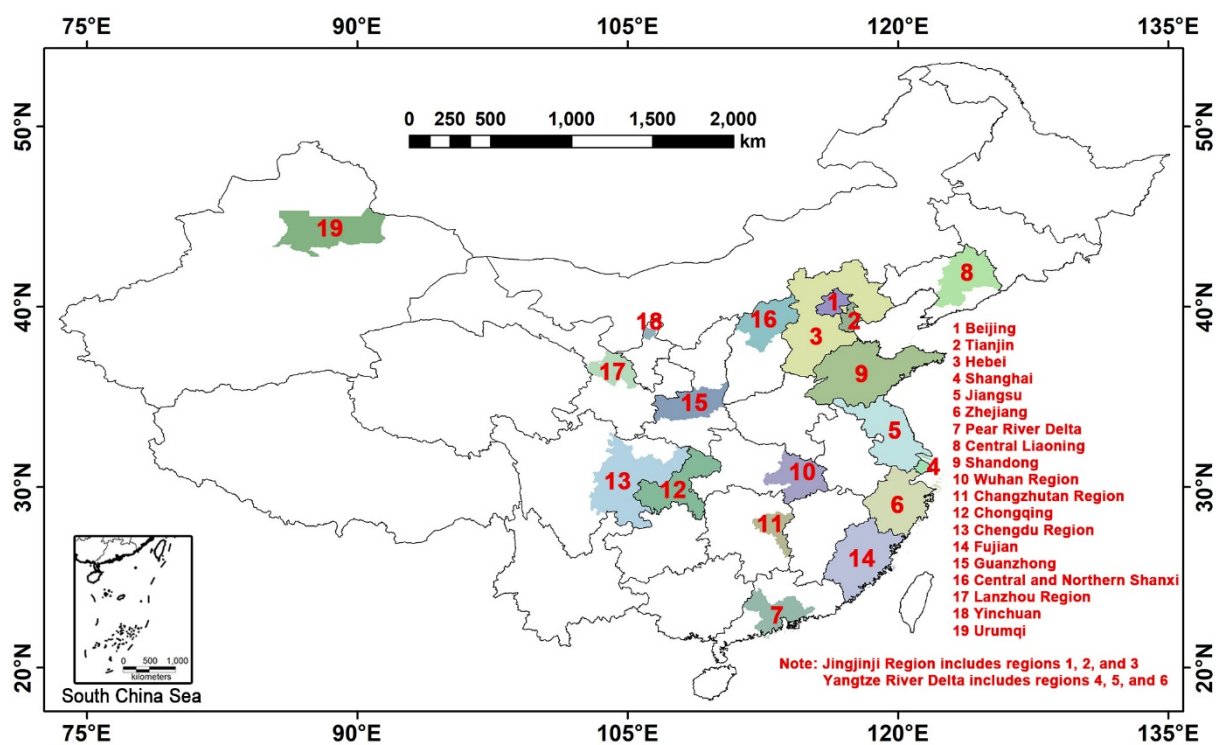

Figure S1. Key regions in 12<sup>th</sup> Five Year Plan on Air Pollution Prevention and Control in Key Regions

**Table S1 Summary statistics of variables for the modeling dataset from 2014 to 2017**

| Year                | Variables <sup>a</sup>                 | Min    | Max     | Median  | Mean   | S.D.  |
|---------------------|----------------------------------------|--------|---------|---------|--------|-------|
| 2014<br>(N=95,649)  | PM <sub>2.5</sub> (µg/m <sup>3</sup> ) | 0.50   | 517.00  | 53.45   | 65.66  | 47.84 |
|                     | AOD (unitless)                         | -0.01  | 4.51    | 0.50    | 0.67   | 0.61  |
|                     | WS (m/s)                               | 0.02   | 18.72   | 3.82    | 4.25   | 2.35  |
|                     | PBLH (100m)                            | 0.61   | 52.93   | 16.22   | 17.07  | 5.86  |
|                     | PS (hPa)                               | 589.22 | 1037.16 | 1001.92 | 980.71 | 55.83 |
|                     | RH_PBLH (%)                            | 7.93   | 96.46   | 49.05   | 49.93  | 18.22 |
|                     | Precip_Lag1 (mm)                       | 0.00   | 200.72  | 0.01    | 1.29   | 5.69  |
|                     | Fire_spots (counts)                    | 0.00   | 462.00  | 0.00    | 2.97   | 10.64 |
|                     | ForestCover (%)                        | 0.00   | 92.52   | 3.75    | 13.10  | 18.74 |
|                     | UrbanCover (%)                         | 0.00   | 100.00  | 22.17   | 27.48  | 22.68 |
| 2015<br>(N=110,805) | PM <sub>2.5</sub> (µg/m <sup>3</sup> ) | 0.50   | 417.99  | 43.64   | 54.02  | 39.32 |
|                     | AOD (unitless)                         | -0.05  | 4.16    | 0.44    | 0.58   | 0.54  |
|                     | WS (m/s)                               | 0.03   | 18.45   | 3.53    | 3.97   | 2.28  |
|                     | PBLH (100m)                            | 0.63   | 49.78   | 15.26   | 16.05  | 6.30  |
|                     | PS (hPa)                               | 558.24 | 1038.16 | 996.03  | 964.45 | 72.78 |
|                     | RH_PBLH (%)                            | 5.30   | 98.81   | 51.37   | 51.75  | 17.74 |
|                     | Precip_Lag1 (mm)                       | 0.00   | 283.99  | 0.02    | 1.71   | 6.83  |
|                     | Fire_spots (counts)                    | 0.00   | 688.00  | 0.00    | 2.58   | 11.29 |
|                     | ForestCover (%)                        | 0.00   | 97.60   | 4.55    | 14.23  | 19.61 |
|                     | UrbanCover (%)                         | 0.00   | 100.00  | 19.19   | 24.23  | 21.10 |
| 2016<br>(N=113,490) | PM <sub>2.5</sub> (µg/m <sup>3</sup> ) | 1.00   | 520.61  | 40.00   | 50.65  | 38.55 |
|                     | AOD (unitless)                         | -0.03  | 4.25    | 0.40    | 0.53   | 0.48  |
|                     | WS (m/s)                               | 0.04   | 15.25   | 3.43    | 3.81   | 2.11  |
|                     | PBLH (100m)                            | 0.71   | 52.44   | 14.13   | 15.04  | 6.45  |
|                     | PS (hPa)                               | 558.16 | 1042.00 | 995.34  | 964.64 | 72.06 |
|                     | RH_PBLH (%)                            | 4.86   | 96.48   | 52.39   | 52.56  | 17.13 |
|                     | Precip_Lag1 (mm)                       | 0.00   | 277.79  | 0.02    | 2.15   | 8.69  |
|                     | Fire_spots (counts)                    | 0.00   | 330.00  | 0.00    | 2.08   | 7.06  |
|                     | ForestCover (%)                        | 0.00   | 97.60   | 4.58    | 14.37  | 19.72 |
|                     | UrbanCover (%)                         | 0.00   | 100.00  | 19.20   | 24.36  | 21.24 |
| 2017<br>(N=123,652) | PM <sub>2.5</sub> (µg/m <sup>3</sup> ) | 2.00   | 632.00  | 39.25   | 48.32  | 35.68 |
|                     | AOD (unitless)                         | -0.03  | 3.99    | 0.38    | 0.50   | 0.46  |
|                     | WS (m/s)                               | 0.03   | 18.22   | 3.57    | 3.94   | 2.18  |
|                     | PBLH (100m)                            | 0.71   | 51.45   | 14.69   | 15.68  | 6.85  |
|                     | PS (hPa)                               | 555.44 | 1038.19 | 997.61  | 968.18 | 69.90 |
|                     | RH_PBLH (%)                            | 7.06   | 97.09   | 48.70   | 49.54  | 16.64 |
|                     | Precip_Lag1 (mm)                       | 0.00   | 240.04  | 0.00    | 1.48   | 6.68  |
|                     | Fire_spots (counts)                    | 0.00   | 288.00  | 0.00    | 2.32   | 8.98  |
|                     | ForestCover (%)                        | 0.00   | 97.60   | 4.58    | 14.45  | 19.81 |
|                     | UrbanCover (%)                         | 0.00   | 100.00  | 19.45   | 24.66  | 21.32 |

<sup>a</sup> Abbreviations used for the meteorological variables: WS: wind speed at 10 m above ground; PBLH: planetary boundary layer height; PS: surface pressure; RH\_PBLH: mean relative humidity in planetary boundary layer; Precip\_Lag1: cumulative precipitation of the previous day.

**Table S2 Fixed effect, model fitting and CV results of the first-stage LME model for each province for 2014 model**

| Province               | N     | Intercept <sup>a</sup> | Slope <sup>a</sup> |                 |       |       |         |             |            | Fitting R <sup>2</sup> | CV R <sup>2</sup> |
|------------------------|-------|------------------------|--------------------|-----------------|-------|-------|---------|-------------|------------|------------------------|-------------------|
|                        |       |                        | AOD                | WS <sup>f</sup> | PBLH  | PS    | RH_PBLH | Precip_Lag1 | Fire_spots |                        |                   |
| Anhui                  | 13373 | 65.11                  | 28.33              |                 |       |       | -57.44  |             | 0.15       | 0.71                   | 0.69              |
| Chongqing              | 6965  | 72.09                  | 30.10              |                 |       | 0.06  |         | -0.13       |            | 0.80                   | 0.76              |
| Fujian <sup>b</sup>    | 7483  | 41.06                  | 14.43              | -1.52           |       | 0.09  | -24.98  |             | 1.17       | 0.69                   | 0.66              |
| Gansu                  | 5873  | 59.91                  | 39.87              | -1.39           | -0.33 | -0.07 | -9.55   |             | 0.38       | 0.80                   | 0.76              |
| Guangdong <sup>c</sup> | 7612  | 50.59                  | 20.81              | -1.13           |       |       | -28.76  |             | 0.62       | 0.76                   | 0.73              |
| Guangxi                | 3227  | 51.84                  | 25.49              | -2.77           |       |       | -19.51  | -0.19       | 0.63       | 0.74                   | 0.68              |
| Guizhou                | 3490  | 67.78                  | 29.12              |                 |       | 0.12  |         |             | 0.09       | 0.81                   | 0.73              |
| Hebei <sup>d</sup>     | 13477 | 69.55                  | 48.36              | -2.41           | -1.11 | 0.20  | -73.09  | -0.27       | 0.17       | 0.79                   | 0.77              |
| Heilongjiang           | 5604  | 53.86                  | 46.13              | -2.03           |       |       |         |             | 0.25       | 0.81                   | 0.77              |
| Henan                  | 6676  | 73.15                  | 30.26              |                 |       |       | -39.01  |             | 0.16       | 0.74                   | 0.69              |
| Hubei                  | 8263  | 72.34                  | 38.37              |                 |       |       | -58.79  | -0.23       |            | 0.76                   | 0.72              |
| Hunan                  | 6829  | 77.31                  | 32.53              |                 |       |       | -64.27  | -0.26       |            | 0.76                   | 0.72              |
| Inner Mongolia         | 28179 | 67.48                  | 50.19              | -3.17           | -0.63 | 0.02  | -53.29  |             | 0.36       | 0.69                   | 0.67              |
| Jiangsu <sup>e</sup>   | 13190 | 118.58                 | 27.79              | -2.22           |       | -1.40 | -44.89  |             | 0.15       | 0.75                   | 0.72              |
| Jiangxi                | 7108  | 56.69                  | 31.44              |                 |       | 0.37  | -45.50  | -0.21       | 0.24       | 0.73                   | 0.68              |
| Jilin                  | 7190  | 56.37                  | 43.94              | -1.84           |       |       | -42.23  | -0.26       | 0.28       | 0.77                   | 0.74              |
| Liaoning               | 19667 | 58.75                  | 36.14              | -2.32           |       |       | -59.05  | -0.18       | 0.43       | 0.71                   | 0.69              |
| Ningxia                | 11263 | 60.50                  | 40.06              | -1.73           |       | -0.05 | -8.33   |             | 0.18       | 0.70                   | 0.66              |
| Qinghai                | 8465  | 66.60                  | 36.28              |                 | -0.66 |       | -18.73  | -0.22       | 0.32       | 0.71                   | 0.63              |
| Shaanxi                | 5929  | 75.53                  | 25.71              |                 |       | 0.17  |         |             | 0.30       | 0.81                   | 0.76              |
| Shandong               | 14021 | 75.53                  | 29.44              | -2.39           |       | -0.23 | -48.91  |             | 0.16       | 0.74                   | 0.72              |
| Shanxi                 | 13274 | 76.15                  | 35.35              |                 |       | 0.20  | -22.82  |             | 0.14       | 0.73                   | 0.70              |
| Sichuang               | 12455 | 64.61                  | 32.88              |                 | -0.56 |       | -25.26  | -0.20       |            | 0.71                   | 0.68              |
| Tibet                  | 2976  | 67.43                  | 35.61              | -2.64           | -0.97 |       | -64.88  | -0.31       |            | 0.81                   | 0.73              |
| Xinjiang               | 12807 | 60.79                  | 43.02              | -1.12           | -0.39 | -0.03 | -18.96  | -0.25       |            | 0.66                   | 0.61              |
| Yunnan                 | 21163 | 58.04                  | 34.61              | -1.71           |       | -0.03 | -45.61  | -0.15       | 0.20       | 0.67                   | 0.64              |
| Zhejiang               | 11901 | 62.03                  | 31.99              |                 |       |       | -48.97  |             | 0.29       | 0.77                   | 0.74              |

<sup>a</sup> Only statistically significant ( $p < 0.05$ ) intercepts and slopes are shown. <sup>b</sup> Including Taiwan. <sup>c</sup> Including Hong Kong, Macao, and Hainan. <sup>d</sup> Including Beijing and Tianjin. <sup>e</sup> Including Shanghai. <sup>f</sup> Abbreviations used for the meteorological variables: WS: wind speed at 10 m above ground; PBLH: planetary boundary layer height; PS: surface pressure; RH\_PBLH: mean relative humidity in planetary boundary layer; Precip\_Lag1: cumulative precipitation of the previous day.

**Table S3 Fixed effect, model fitting and CV results of the first-stage LME model for each province for 2015 model**

| Province               | N     | Intercept <sup>a</sup> | Slope <sup>a</sup> |                 |       |       |         |             |            | Fitting R <sup>2</sup> | CV R <sup>2</sup> |
|------------------------|-------|------------------------|--------------------|-----------------|-------|-------|---------|-------------|------------|------------------------|-------------------|
|                        |       |                        | AOD                | WS <sup>f</sup> | PBLH  | PS    | RH_PBLH | Precip_Lag1 | Fire_spots |                        |                   |
| Anhui                  | 13635 | 47.62                  | 24.29              |                 |       | 0.23  | -45.81  | -0.10       | 0.07       | 0.69                   | 0.66              |
| Chongqing              | 7024  | 55.05                  | 19.47              | -1.01           |       | 0.13  | -8.95   | -0.19       | 0.24       | 0.75                   | 0.70              |
| Fujian <sup>b</sup>    | 7719  | 34.16                  | 10.07              | -1.50           | -0.27 | 0.04  | -25.53  | -0.08       | 0.53       | 0.70                   | 0.65              |
| Gansu                  | 32540 | 59.03                  | 32.04              |                 |       | 0.06  | -20.57  | -0.27       | 0.05       | 0.62                   | 0.60              |
| Guangdong <sup>c</sup> | 5853  | 36.64                  | 12.24              | -0.80           | -0.93 |       |         |             | 0.29       | 0.77                   | 0.73              |
| Guangxi                | 3992  | 43.76                  | 14.64              | -1.92           | -0.87 |       |         | -0.07       | 0.15       | 0.72                   | 0.65              |
| Guizhou                | 12853 | 51.40                  | 16.15              | -1.49           |       | 0.09  | -10.60  | -0.20       |            | 0.72                   | 0.69              |
| Hebei <sup>d</sup>     | 9771  | 54.44                  | 40.71              | -2.26           |       | 0.16  | -37.12  |             |            | 0.79                   | 0.76              |
| Heilongjiang           | 8641  | 41.10                  | 28.66              |                 |       |       | -25.68  |             | 0.16       | 0.73                   | 0.69              |
| Henan                  | 9895  | 61.21                  | 29.23              |                 |       | 0.08  | -52.16  | -0.21       | 0.08       | 0.69                   | 0.65              |
| Hubei                  | 12826 | 54.70                  | 25.27              |                 |       | 0.14  | -21.69  | -0.18       |            | 0.70                   | 0.67              |
| Hunan                  | 9419  | 55.28                  | 22.17              | -1.12           |       | 0.07  | -32.24  | -0.15       |            | 0.71                   | 0.67              |
| Inner Mongolia         | 31502 | 56.35                  | 40.51              | -1.59           |       |       | -28.54  | -0.10       | 0.21       | 0.62                   | 0.60              |
| Jiangsu <sup>e</sup>   | 12027 | 86.43                  | 24.78              |                 |       | -0.53 | -52.36  |             | 0.09       | 0.75                   | 0.73              |
| Jiangxi                | 17732 | 42.81                  | 22.67              | -2.16           |       | 0.21  | -41.73  | -0.07       |            | 0.66                   | 0.63              |
| Jilin                  | 3755  | 45.83                  | 30.60              |                 |       |       |         |             | 0.19       | 0.79                   | 0.71              |
| Liaoning               | 9400  | 48.82                  | 18.21              |                 |       |       | -17.36  |             | 0.30       | 0.76                   | 0.73              |
| Ningxia                | 4241  | 56.86                  | 30.46              |                 |       |       |         |             |            | 0.64                   | 0.56              |
| Qinghai                | 15971 | 54.07                  | 27.86              |                 | -0.47 |       | -9.16   | -0.29       |            | 0.57                   | 0.52              |
| Shaanxi                | 5315  | 50.59                  | 25.05              |                 |       |       |         | -0.15       |            | 0.77                   | 0.72              |
| Shandong               | 10429 | 75.81                  | 31.05              | -2.01           |       | -0.33 | -50.63  |             | 0.25       | 0.77                   | 0.74              |
| Shanxi                 | 11357 | 62.95                  | 29.52              |                 |       | 0.16  | -32.53  | -0.19       |            | 0.74                   | 0.71              |
| Sichuang               | 8914  | 54.04                  | 24.73              | -1.03           | -0.50 | 0.05  | -16.26  | -0.25       |            | 0.66                   | 0.61              |
| Tibet                  | 7799  | 66.10                  | 43.62              |                 |       | 0.05  | -60.75  | -0.43       |            | 0.53                   | 0.43              |
| Xinjiang               | 7190  | 60.29                  | 64.37              |                 |       |       | -34.22  | -0.52       |            | 0.44                   | 0.34              |
| Yunnan                 | 10510 | 48.94                  | 16.79              | -1.63           |       | 0.07  | -11.22  | -0.26       | 0.14       | 0.70                   | 0.65              |
| Zhejiang               | 10584 | 39.99                  | 23.17              | -1.30           |       | 0.32  | -31.92  | -0.07       | 0.00       | 0.78                   | 0.75              |

<sup>a</sup> Only statistically significant ( $p < 0.05$ ) intercepts and slopes are shown. <sup>b</sup> Including Taiwan. <sup>c</sup> Including Hong Kong, Macao, and Hainan. <sup>d</sup> Including Beijing and Tianjin. <sup>e</sup> Including Shanghai. <sup>f</sup> Abbreviations used for the meteorological variables: WS: wind speed at 10 m above ground; PBLH: planetary boundary layer height; PS: surface pressure; RH\_PBLH: mean relative humidity in planetary boundary layer; Precip\_Lag1: cumulative precipitation of the previous day.

**Table S4 Fixed effect, model fitting and CV results of the first-stage LME model for each province for 2016 model**

| Province               | N     | Intercept <sup>a</sup> | Slope <sup>a</sup> |                 |       |       |         |             |            | Fitting R <sup>2</sup> | CV R <sup>2</sup> |
|------------------------|-------|------------------------|--------------------|-----------------|-------|-------|---------|-------------|------------|------------------------|-------------------|
|                        |       |                        | AOD                | WS <sup>f</sup> | PBLH  | PS    | RH_PBLH | Precip_Lag1 | Fire_spots |                        |                   |
| Anhui                  | 14914 | 44.80                  | 24.24              |                 |       | 0.16  | -42.67  | -0.10       |            | 0.76                   | 0.73              |
| Chongqing              | 9190  | 54.67                  | 25.94              |                 |       | 0.10  | -39.43  | -0.04       | 0.11       | 0.74                   | 0.70              |
| Fujian <sup>b</sup>    | 7168  | 31.80                  | 10.22              | -1.72           |       | 0.11  | -31.00  | -0.03       | 0.40       | 0.66                   | 0.61              |
| Gansu                  | 9467  | 54.31                  | 38.43              | -1.14           |       |       | -26.24  | -0.18       |            | 0.74                   | 0.70              |
| Guangdong <sup>c</sup> | 8286  | 39.28                  | 15.12              | -1.37           |       |       |         | -0.07       | 0.40       | 0.65                   | 0.61              |
| Guangxi                | 4083  | 41.75                  | 15.11              | -1.64           |       | 0.05  | -18.97  |             |            | 0.73                   | 0.67              |
| Guizhou                | 14281 | 48.26                  | 20.43              | -1.73           |       | 0.08  | -15.63  | -0.08       | 0.20       | 0.69                   | 0.66              |
| Hebei <sup>d</sup>     | 10642 | 50.53                  | 43.07              | -1.72           | -0.78 | 0.11  | -36.68  | -0.13       |            | 0.79                   | 0.77              |
| Heilongjiang           | 9647  | 34.59                  | 22.03              |                 |       | 0.21  | -26.11  |             | 0.09       | 0.70                   | 0.65              |
| Henan                  | 11188 | 54.77                  | 31.47              |                 |       | -0.03 | -57.98  |             | 0.12       | 0.79                   | 0.76              |
| Hubei                  | 15131 | 54.38                  | 29.60              | -0.99           |       |       | -36.59  | -0.10       | 0.12       | 0.73                   | 0.71              |
| Hunan                  | 13082 | 47.55                  | 21.75              | -0.83           |       | 0.05  | -18.74  | -0.11       | 0.15       | 0.70                   | 0.66              |
| Inner Mongolia         | 33307 | 50.79                  | 41.73              | -1.79           |       |       | -33.24  | -0.12       | 0.10       | 0.63                   | 0.61              |
| Jiangsu <sup>e</sup>   | 13355 | 74.35                  | 24.50              |                 |       | -0.42 | -53.70  | -0.06       |            | 0.79                   | 0.77              |
| Jiangxi                | 15457 | 39.13                  | 20.02              | -0.91           |       | 0.21  | -23.39  | -0.09       | 0.32       | 0.68                   | 0.66              |
| Jilin                  | 8300  | 34.74                  | 21.92              |                 | -0.51 | 0.22  |         |             | 0.08       | 0.74                   | 0.69              |
| Liaoning               | 19799 | 44.26                  | 31.22              | -2.06           |       |       | -35.91  |             | 0.15       | 0.69                   | 0.67              |
| Ningxia                | 12035 | 53.18                  | 42.44              | -1.27           |       |       | -31.71  | -0.12       |            | 0.71                   | 0.68              |
| Qinghai                | 2993  | 56.11                  | 32.53              | -1.94           |       |       |         |             |            | 0.61                   | 0.45              |
| Shaanxi                | 8809  | 56.45                  | 35.21              |                 |       | 0.11  | -25.20  | -0.12       |            | 0.77                   | 0.72              |
| Shandong               | 11375 | 68.09                  | 27.67              | -2.47           |       | -0.31 |         |             | 0.23       | 0.78                   | 0.76              |
| Shanxi                 | 16385 | 57.44                  | 36.74              | -1.89           | -0.44 | 0.09  | -23.85  | -0.09       |            | 0.75                   | 0.73              |
| Sichuang               | 4920  | 51.91                  | 15.04              |                 |       | 0.10  |         | -0.05       |            | 0.77                   | 0.73              |
| Tibet                  | 15310 | 59.53                  | 40.02              |                 |       | 0.06  | -53.59  | -0.07       |            | 0.52                   | 0.44              |
| Xinjiang               | 7087  | 53.79                  | 59.94              |                 |       |       | -46.31  | -0.37       |            | 0.59                   | 0.45              |
| Yunnan                 | 11281 | 46.89                  | 19.54              | -1.63           |       | 0.07  | -20.59  | -0.07       | 0.16       | 0.67                   | 0.63              |
| Zhejiang               | 14726 | 31.11                  | 19.40              | -2.02           |       | 0.37  | -27.66  | -0.04       | 0.18       | 0.75                   | 0.73              |

<sup>a</sup> Only statistically significant ( $p < 0.05$ ) intercepts and slopes are shown. <sup>b</sup> Including Taiwan. <sup>c</sup> Including Hong Kong, Macao, and Hainan. <sup>d</sup> Including Beijing and Tianjin. <sup>e</sup> Including Shanghai. <sup>f</sup> Abbreviations used for the meteorological variables: WS: wind speed at 10 m above ground; PBLH: planetary boundary layer height; PS: surface pressure; RH\_PBLH: mean relative humidity in planetary boundary layer; Precip\_Lag1: cumulative precipitation of the previous day.

**Table S5 Fixed effect, model fitting and CV results of the first-stage LME model for each province for 2017 model**

| Province               | N     | Intercept <sup>a</sup> | Slope <sup>a</sup> |                 |       |      |         |             |            | Fitting R <sup>2</sup> | CV R <sup>2</sup> |
|------------------------|-------|------------------------|--------------------|-----------------|-------|------|---------|-------------|------------|------------------------|-------------------|
|                        |       |                        | AOD                | WS <sup>f</sup> | PBLH  | PS   | RH_PBLH | Precip_Lag1 | Fire_spots |                        |                   |
| Anhui                  | 10643 | 33.34                  | 24.43              |                 |       | 0.43 | -28.16  |             |            | 0.78                   | 0.76              |
| Chongqing              | 2954  | 40.28                  | 12.39              |                 |       |      | 14.44   |             |            | 0.85                   | 0.77              |
| Fujian <sup>b</sup>    | 8428  | 33.50                  | 8.66               | -1.50           |       | 0.10 | -35.31  | -0.12       |            | 0.65                   | 0.61              |
| Gansu                  | 9362  | 52.93                  | 43.23              |                 |       |      | -17.89  | -0.39       |            | 0.79                   | 0.76              |
| Guangdong <sup>c</sup> | 8309  | 37.25                  | 15.70              | -1.46           |       |      |         | -0.07       | 0.36       | 0.71                   | 0.67              |
| Guangxi                | 4518  | 39.88                  | 20.87              | -2.43           |       | 0.04 |         |             | 0.64       | 0.77                   | 0.69              |
| Guizhou                | 9340  | 43.05                  | 15.72              | -1.53           |       | 0.05 |         | -0.11       | 0.25       | 0.75                   | 0.71              |
| Hebei <sup>d</sup>     | 11179 | 46.71                  | 45.70              | -1.45           |       | 0.08 | -46.86  |             | 0.08       | 0.82                   | 0.79              |
| Heilongjiang           | 6849  | 30.83                  | 23.82              |                 |       |      |         |             | 0.18       | 0.73                   | 0.69              |
| Henan                  | 12266 | 57.19                  | 33.39              |                 |       |      | -52.46  | -0.11       | 0.16       | 0.78                   | 0.75              |
| Hubei                  | 13316 | 52.16                  | 29.69              | -0.62           |       |      |         | -0.13       | 0.22       | 0.76                   | 0.73              |
| Hunan                  | 9302  | 46.88                  | 21.65              |                 |       | 0.09 |         | -0.11       | 0.12       | 0.79                   | 0.76              |
| Inner Mongolia         | 35210 | 47.03                  | 38.35              | -1.72           | -0.40 |      | -29.59  |             | 0.24       | 0.65                   | 0.63              |
| Jiangsu <sup>e</sup>   | 12634 | 74.10                  | 21.35              | -1.40           |       |      |         |             | 0.14       | 0.81                   | 0.79              |
| Jiangxi                | 10413 | 37.41                  | 17.66              |                 |       | 0.32 | -9.71   | -0.08       | 0.20       | 0.76                   | 0.72              |
| Jilin                  | 4419  | 30.17                  | 22.24              |                 | -0.84 |      |         |             | 0.25       | 0.73                   | 0.66              |
| Liaoning               | 11202 | 39.08                  | 19.20              |                 |       |      | -23.87  |             | 0.37       | 0.74                   | 0.71              |
| Ningxia                | 12247 | 53.82                  | 47.68              |                 |       |      | -21.65  | -0.46       |            | 0.78                   | 0.75              |
| Qinghai                | 16382 | 52.46                  | 33.20              |                 |       | 0.05 | -20.85  | -0.33       |            | 0.70                   | 0.66              |
| Shaanxi                | 7989  | 56.31                  | 44.65              |                 |       | 0.12 | -30.19  | -0.31       |            | 0.82                   | 0.79              |
| Shandong               | 12010 | 54.14                  | 27.18              | -2.29           |       |      | -39.52  |             | 0.16       | 0.77                   | 0.74              |
| Shanxi                 | 11897 | 60.05                  | 38.03              | -2.14           | -0.47 | 0.03 |         | -0.27       |            | 0.77                   | 0.74              |
| Sichuang               | 5963  | 48.93                  | 11.73              |                 |       | 0.10 |         | -0.11       |            | 0.82                   | 0.79              |
| Tibet                  | 7907  | 63.19                  | 42.87              |                 |       | 0.08 | -54.34  | -0.22       |            | 0.67                   | 0.56              |
| Xinjiang               | 7407  | 52.28                  | 57.15              |                 |       |      | -23.09  | -0.43       |            | 0.54                   | 0.38              |
| Yunnan                 | 8039  | 45.24                  | 19.31              | -0.99           |       | 0.06 | -15.24  | -0.14       | 0.17       | 0.74                   | 0.70              |
| Zhejiang               | 12987 | 33.98                  | 20.92              | -1.48           |       | 0.26 |         |             | 0.24       | 0.77                   | 0.75              |

<sup>a</sup> Only statistically significant ( $p < 0.05$ ) intercepts and slopes are shown. <sup>b</sup> Including Taiwan. <sup>c</sup> Including Hong Kong, Macao, and Hainan. <sup>d</sup> Including Beijing and Tianjin. <sup>e</sup> Including Shanghai. <sup>f</sup> Abbreviations used for the meteorological variables: WS: wind speed at 10 m above ground; PBLH: planetary boundary layer height; PS: surface pressure; RH\_PBLH: mean relative humidity in planetary boundary layer; Precip\_Lag1: cumulative precipitation of the previous day.

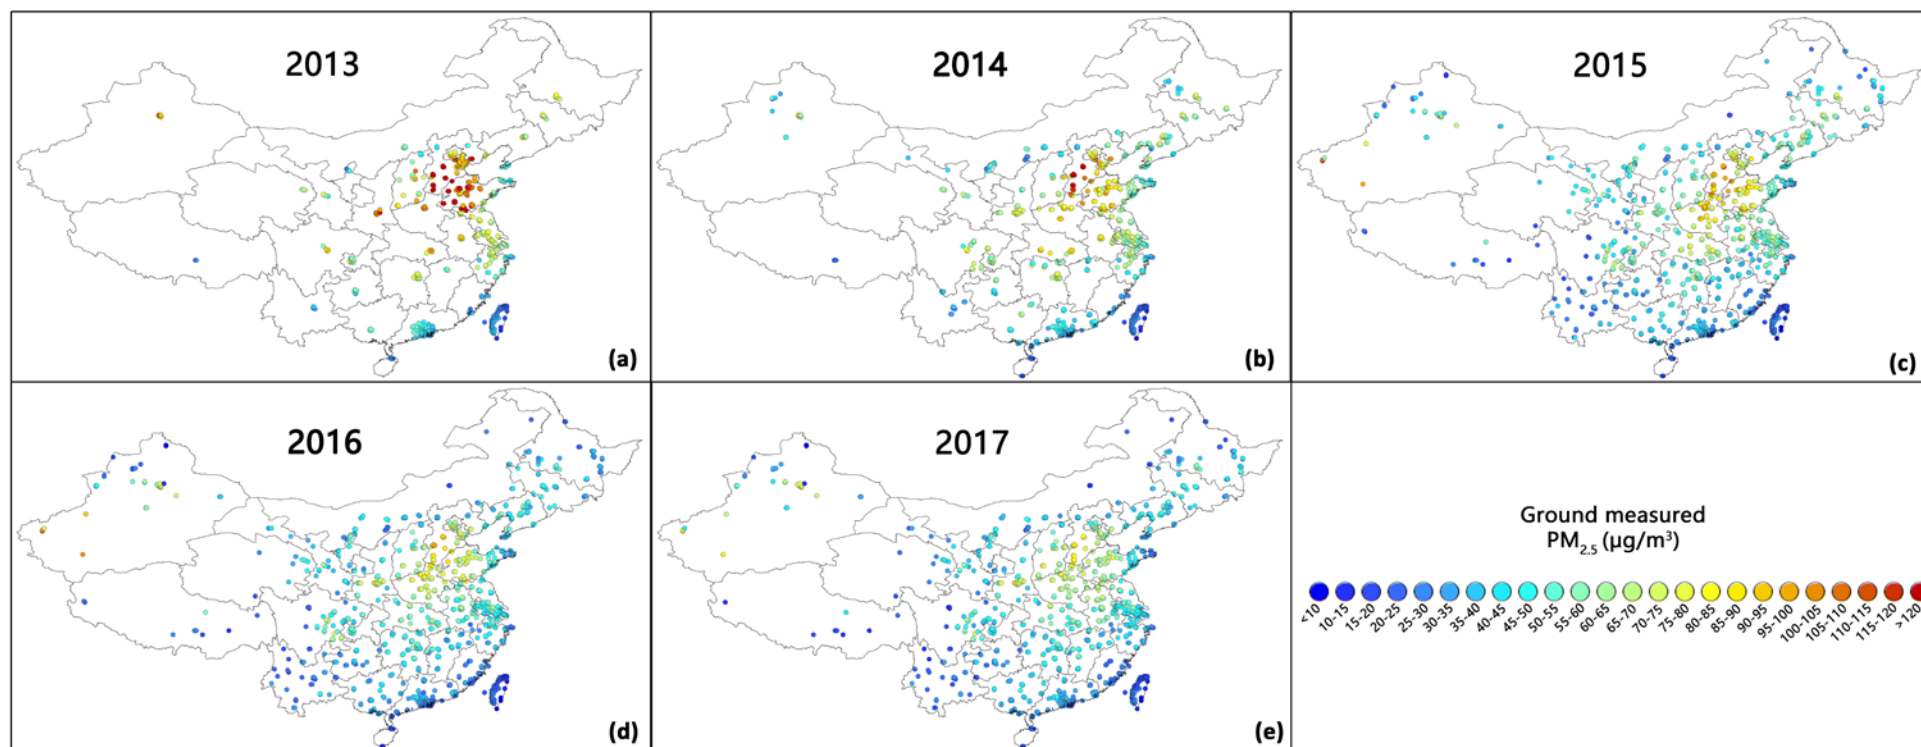

Figure S2. Spatial distributions of annual mean ground measured  $PM_{2.5}$  concentrations in China from 2013 to 2017



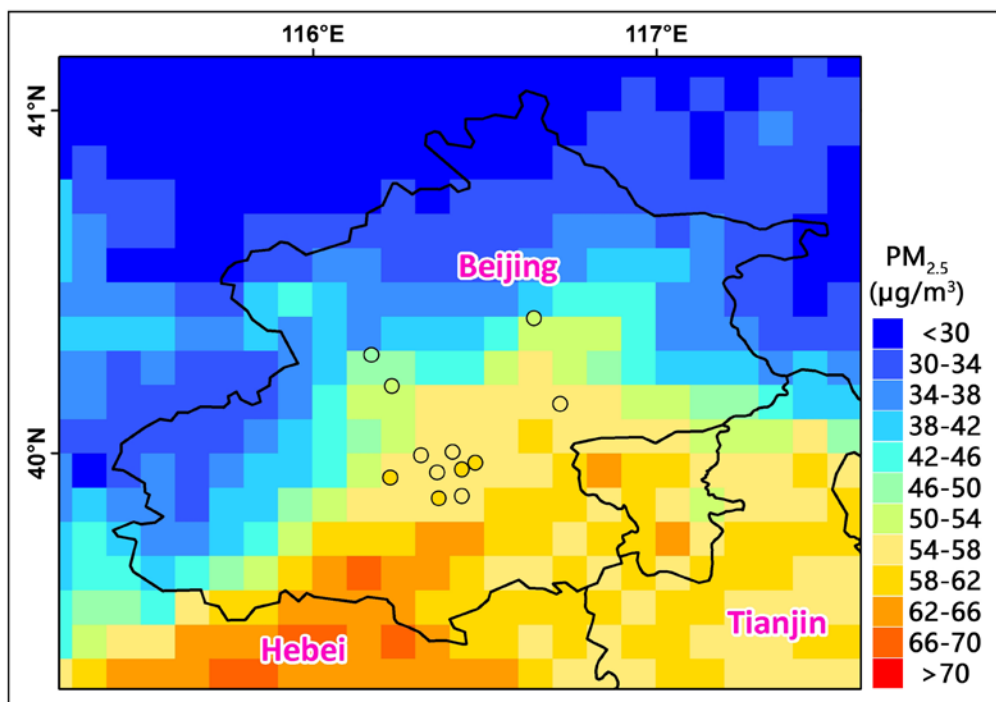

Figure S3 Spatial distribution of satellite and ground PM<sub>2.5</sub> concentrations of 2017 in Beijing. The circles denote the ground monitoring stations.
